# Supplementary material
Source: PubMed Central journal article supplement (PMC3428005)

**Transgenic *Arabidopsis thaliana* expressing a barley UDP-  
glucosyltransferase exhibit resistance to the mycotoxin deoxynivalenol**

Sanghyun Shin<sup>1†\*</sup>, Juan Antonio Torres-Acosta<sup>2\*</sup>, Shane J. Heinen<sup>1</sup>, Susan McCormick<sup>4</sup>,  
Marc Lemmens<sup>3</sup>, Maria Paula Kovalsky Paris<sup>2</sup>, Franz Berthiller<sup>3</sup>, Gerhard Adam<sup>2</sup>, Gary J.  
Muehlbauer<sup>1\*</sup>

<sup>1</sup> Department of Agronomy and Plant Genetics, University of Minnesota, 411 Borlaug Hall, 1991  
Buford Circle, St Paul, MN 55108, USA

<sup>2</sup> Department of Applied Genetics and Cell Biology, University of Natural Resources and Life  
Sciences, Vienna, University Research Center Tulln, Konrad Lorenz Str. 24, A-3430 Tulln, Austria ‡

<sup>3</sup> Department for Agrobiotechnology - IFA-Tulln, Center for Analytical Chemistry (Christian  
Doppler Laboratory for Mycotoxin Metabolism) and Biotechnology in Plant Production,  
University of Natural Resources and Life Sciences, Konrad Lorenz Str. 20, A-3430 Tulln,  
Austria

<sup>4</sup> USDA-ARS, Bacterial Foodborne Pathogens & Mycology Research Unit, Peoria, Illinois 61604,  
USA

**Supplementary Figure 1.** Seeds from transgenic lines #28 and #40 and the non transgenic control Col-0 were germinated and grown on MS, 50 and 75 mg/L of deoxynivalenol. The high expression line #28 exhibited more and faster germination and growth than the low expression line #40.

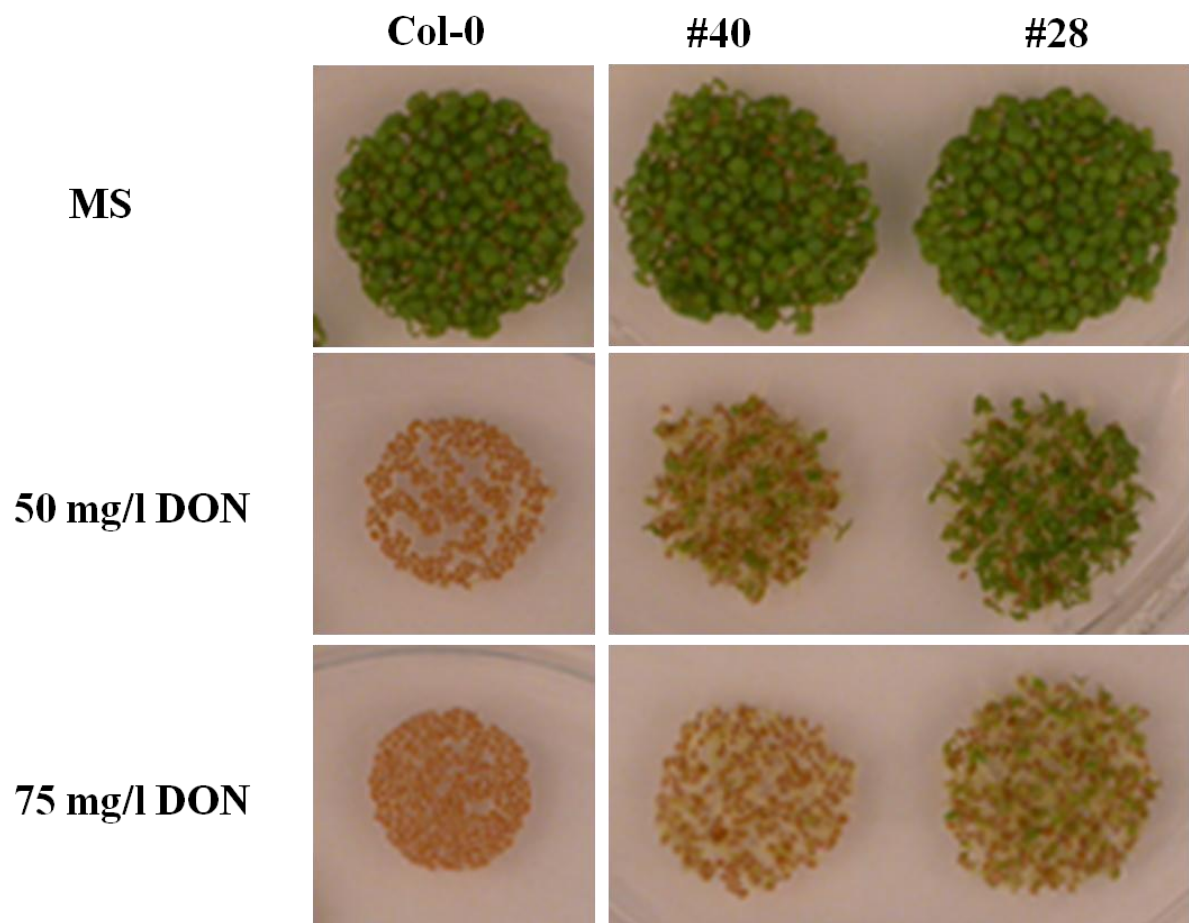

**Supplementary Figure 2.** Growth of HvUGT13248 expressing *Arabidopsis thaliana* (#28) and control (Col-0) plants on MS medium containing different concentrations of DON

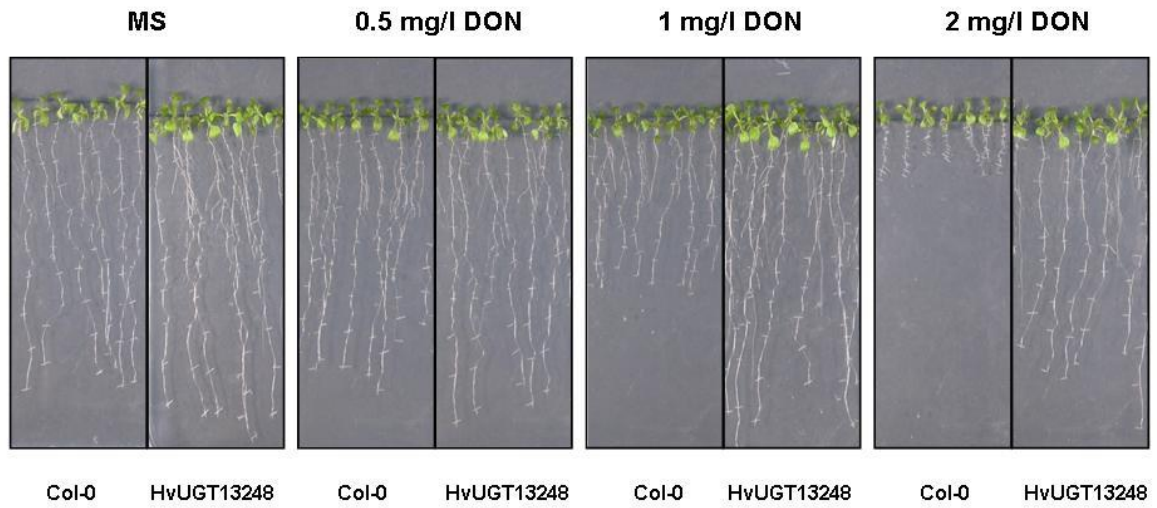

Supplement: supp_ers141_00077156_file001.pdf [file supp_ers141_00077156_file001.pdf]
